# Supplementary material
Source: PubMed Central journal article supplement (PMC8245176)
Supplement: jci-131-148763-s105.pdf [file jci-131-148763-s105.pdf]

## **List of Supplemental Materials**

Supplemental Figure 1. Serology and repertoire features of different age groups.

Supplemental Figure 2. Features of rH1 and rH3-binding antibodies.

Supplemental Figure 3. Binding characteristics of the non-rHA binding s-mAbs.

Supplemental Table 1. Demographics of volunteers.

Supplemental Table 2. Expressed serum monoclonal antibodies (s-mAbs) and their specificities.

Supplemental Table 3. Glycan array binding data for top 100 glycans.

Supplemental Data Set 1 (Microsoft Excel format). Tabulated serum antibody clonotypes identified from Ig-Seq analysis.

A

| Vaccinated Age | Age Group | Donor (Year) | Influenza H1N1 strains |          |       |        |       |         |          |         |       |       |            |       |         |       | Vaccine strain<br>↓ |
|----------------|-----------|--------------|------------------------|----------|-------|--------|-------|---------|----------|---------|-------|-------|------------|-------|---------|-------|---------------------|
|                |           |              | SC/18                  | Weiss/43 | FM/47 | Den/57 | NJ/76 | USSR/77 | Chile/83 | Sing/86 | TX/91 | BJ/95 | New Cal/99 | SI/06 | Bris/07 | CA/09 |                     |
| 26             | Y         | 1158(2014)   | 80                     | 80       | 10    | 5      | 80    | 5       | 5        | 40      | 10    | 5     | 5          | 10    | 5       | 80    | 80                  |
| 33             | Y         | 1025(2013)   | 40                     | 5        | 20    | 5      | 10    | 20      | 20       | 5       | 10    | 5     | 40         | 5     | 5       | 80    | 80                  |
| 33             | Y         | 1074(2013)   | 5                      | 80       | 80    | 160    | 5     | 40      | 40       | 320     | 320   | 320   | 640        | 320   | 5       | 80    | 80                  |
| 57             | M         | 236(2013)    | 40                     | 640      | 160   | 640    | 5     | 160     | 80       | 320     | 320   | 320   | 640        | 80    | 20      | 160   | 160                 |
| 61             | M         | 1014(2013)   | 5                      | 5        | 40    | 40     | 5     | 40      | 40       | 40      | 40    | 10    | 40         | 40    | 5       | 80    | 80                  |
| 61             | M         | 1088(2013)   | 5                      | 5        | 20    | 5      | 5     | 40      | 10       | 5       | 5     | 10    | 5          | 5     | 5       | 80    | 80                  |
| 65             | E         | 1044(2013)   | 10                     | 10       | 1280  | 5      | 10    | 160     | 160      | 80      | 80    | 5     | 5          | 20    | 5       | 320   | 320                 |
| 67             | E         | 1117(2013)   | 10                     | 5        | 80    | 20     | 5     | 40      | 5        | 10      | 10    | 20    | 40         | 20    | 5       | 160   | 160                 |
| 69             | E         | 1131(2013)   | 5                      | 5        | 20    | 5      | 5     | 40      | 5        | 5       | 5     | 10    | 5          | 10    | 5       | 20    | 20                  |
| 70             | E         | 29(2013)     | 5                      | 5        | 40    | 5      | 5     | 80      | 20       | 5       | 5     | 10    | 5          | 20    | 10      | 20    | 20                  |

  

| Influenza H3N2 strains |           | Vaccine strain<br>↓ |     |    |    |     |     |     |     |     |      |      |     |      |     |      |      |
|------------------------|-----------|---------------------|-----|----|----|-----|-----|-----|-----|-----|------|------|-----|------|-----|------|------|
| Vaccinated Age         | Age Group |                     |     |    |    |     |     |     |     |     |      |      |     |      |     |      |      |
| 26                     | Y         | 1158(2014)          | 5   | 5  | 20 | 80  | 160 | 80  | 160 | 160 | 640  | 1280 | 5   | 1280 | 640 | 1280 | 1280 |
| 33                     | Y         | 1025(2013)          | 5   | 5  | 40 | 80  | 40  | 40  | 40  | 80  | 80   | 80   | 5   | 640  | 160 | 160  | 160  |
| 33                     | Y         | 1074(2013)          | 5   | 5  | 80 | 160 | 80  | 320 | 640 | 320 | 320  | 80   | 320 | 5    | 160 | 160  | 160  |
| 57                     | M         | 236(2013)           | 160 | 80 | 40 | 40  | 10  | 80  | 320 | 320 | 1280 | 160  | 160 | 160  | 10  | 40   | 40   |
| 61                     | M         | 1014(2013)          | 10  | 5  | 20 | 10  | 20  | 40  | 160 | 80  | 640  | 160  | 5   | 1280 | 160 | 320  | 320  |
| 61                     | M         | 1088(2013)          | 20  | 5  | 5  | 5   | 5   | 10  | 5   | 10  | 5    | 5    | 5   | 40   | 20  | 20   | 40   |
| 65                     | E         | 1044(2013)          | 20  | 5  | 5  | 20  | 20  | 40  | 80  | 40  | 40   | 20   | 5   | 640  | 80  | 80   | 160  |
| 67                     | E         | 1117(2013)          | 160 | 80 | 40 | 80  | 40  | 40  | 80  | 80  | 320  | 40   | 5   | 640  | 160 | 160  | 320  |
| 69                     | E         | 1131(2013)          | 5   | 5  | 10 | 80  | 10  | 10  | 20  | 40  | 160  | 40   | 5   | 80   | 20  | 40   | 20   |
| 70                     | E         | 29(2013)            | 80  | 5  | 40 | 80  | 20  | 160 | 320 | 160 | 640  | 80   | 5   | 320  | 80  | 80   | 80   |

B

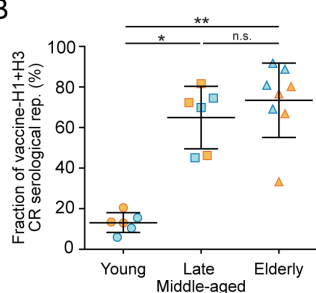

C

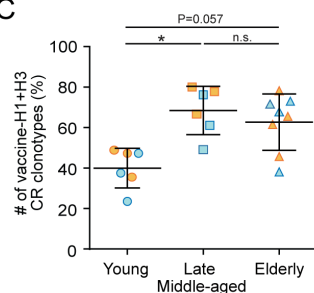

D

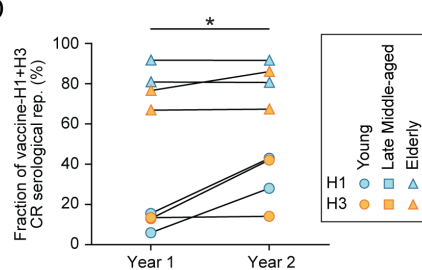

**Supplemental Figure 1. Serology and repertoire features of different age groups.** (A) HAI titers to 14 historical H1N1 and 15 historical H3N2 strains. Vaccine strains are highlighted in red box. (B) Fraction of the abundance of vaccine-H1+H3 CR clonotypes in the anti-vaccine-H1 and anti-vaccine-H3 serum repertoires (Kruskal-Wallis test followed by Dunn's post-hoc test). Mean  $\pm$  SD shown for each group (n=6, 6, 8). (C) Fraction of the number of vaccine-H1+H3 CR clonotypes in the anti-vaccine-H1 and anti-vaccine-H3 serum repertoires (Kruskal-Wallis test followed by Dunn's post-hoc test). Mean  $\pm$  SD shown for each group (n=6, 6, 8). (D) The fraction of vaccine-H1+H3 CR clonotypes in the serological repertoire of 4 donors vaccinated in 2013-2014 and in 2014-2015 season with the identical Fluzone® vaccine (A/California/07/2009, A/Texas/50/2012, B/Massachusetts/2/2012) (Wilcoxon signed-rank test, two-tailed).

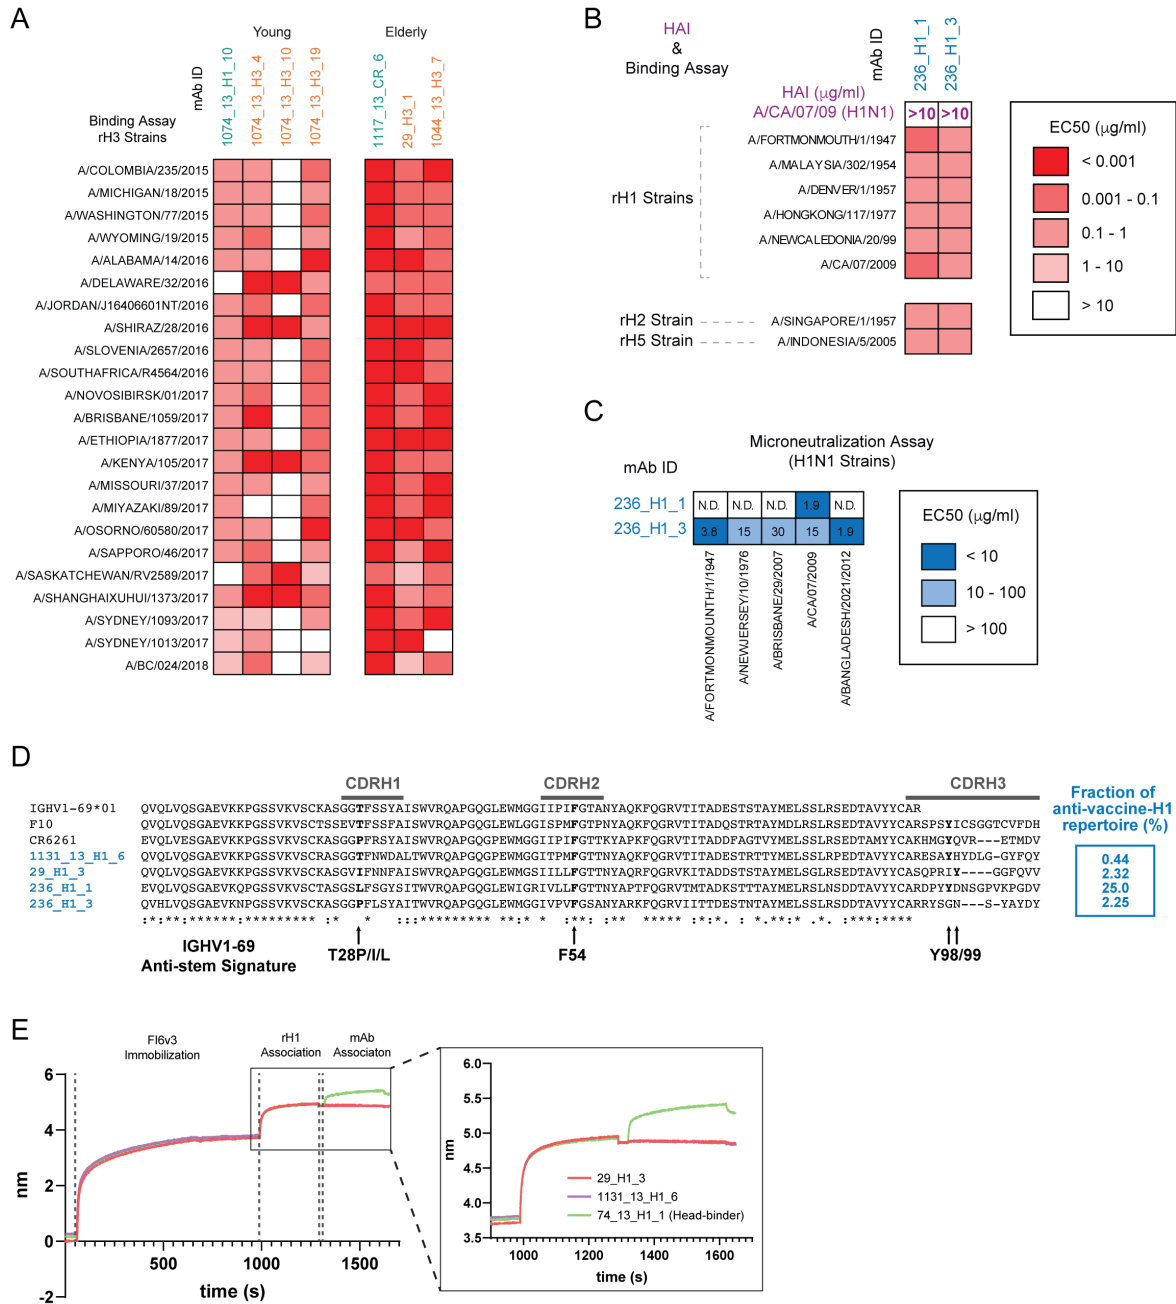

**Supplemental Figure 2. Features of rH1 and rH3-binding antibodies.** (A) Binding specificity of anti-rH3 s-mAbs to rHAs from additional contemporary H3 strains. (B) HAI titer and binding specificity of the two s-mAbs from Donor-236 (late middle-aged) to historical group 1 rHAs. (C) s-mAbs showing a stem binding signature have microneutralization activity. N.D.: No data available. (D) 4 isolated s-mAbs showing IGHV1-69 anti-stem signatures from one middle-aged (Donor-236) and two elderly donors (Donor-29 and Donor-1131). Alignment was performed with Clustal Omega (1.2.4) multiple sequence alignment. (E) Biolayer Interferometry (BLI) data that shows competition of the two mAbs showing IGHV1-69 anti-stem signature with an anti-stem antibody, FI6v3. A head-binding antibody, 74\_13\_H1\_1, was used as a non-competing antibody control.

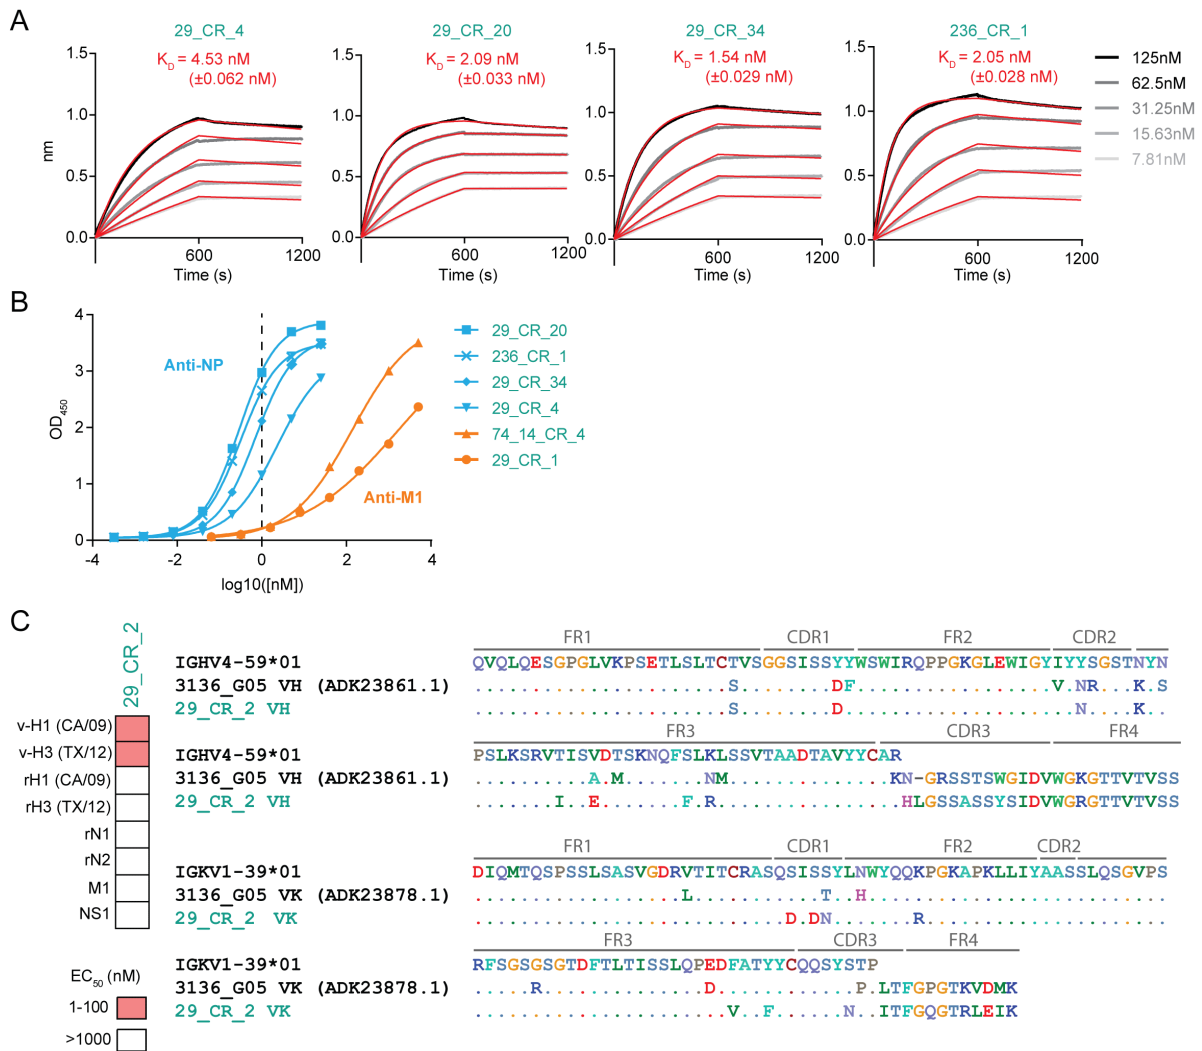

**Supplemental Figure 3. Binding characteristics of the non-rHA binding s-mAbs. (A)** BLI data of NP-targeting s-mAbs. Average  $K_D$  and error values from  $n=2$  replicates shown. **(B)** ELISA data showing NP and M1-targeting s-mAbs. **(C)** Heatmap showing specificity of 29\_CR\_2 to the vaccine via ELISA and the alignment to a published M2e-specific mAb (3136\_G05: ADK23861.1).

**Supplemental Table 1. Demographics of volunteers.**

| Donor ID | Birth year | Age group (Age criteria) | Vaccination season (Type)          | Gender | Ethnicity        |
|----------|------------|--------------------------|------------------------------------|--------|------------------|
| 1158     | 1988       | Young (26-33)            | Fluzone® 2014-2015 (Standard-dose) | Female | White/Caucasian  |
| 1025     | 1980       | Young (26-33)            | Fluzone® 2013-2014 (Standard-dose) | Female | Hispanic/Latino  |
|          |            |                          | Fluzone® 2014-2015 (Standard-dose) |        |                  |
| 1074     | 1980       | Young (26-33)            | Fluzone® 2013-2014 (Standard-dose) | Female | Hispanic/Latino  |
|          |            |                          | Fluzone® 2014-2015 (Standard-dose) |        |                  |
| 236      | 1956       | Late Middle-aged (57-61) | Fluzone® 2013-2014 (Standard-dose) | Male   | African American |
| 1014     | 1952       | Late Middle-aged (57-61) | Fluzone® 2013-2014 (Intradermal)   | Female | African American |
| 1088     | 1952       | Late Middle-aged (57-61) | Fluzone® 2013-2014 (Standard-dose) | Male   | White/Caucasian  |
| 1044     | 1948       | Elderly (65+)            | Fluzone® 2013-2014 (Standard-dose) | Female | White/Caucasian  |
| 1117     | 1946       | Elderly (65+)            | Fluzone® 2013-2014 (High-dose)     | Female | White/Caucasian  |
|          |            |                          | Fluzone® 2014-2015 (High-dose)     |        |                  |
| 1131     | 1944       | Elderly (65+)            | Fluzone® 2013-2014 (High-dose)     | Female | African American |
|          |            |                          | Fluzone® 2014-2015 (High-dose)     |        |                  |
| 29       | 1943       | Elderly (65+)            | Fluzone® 2013-2014 (Standard-dose) | Female | African American |

**Supplemental Table 2. Expressed serum monoclonal antibodies (s-mAbs) and their specificities.**

| mAb ID<br>(Donor_Year<br>vaccinated_Specificity from Ig-Seq_Rank by abundance) | mAb Specificity | CDRH3                | CDRL3        | v-H1 PSM | v-H3 PSM | v-H1 XIC (%) | v-H3 XIC (%) |
|--------------------------------------------------------------------------------|-----------------|----------------------|--------------|----------|----------|--------------|--------------|
| 1074_13_CR_1                                                                   | CR(Glycan)      | ARAIAAAGSY           | AAWDDSLNGLV  | 71       | 61       | 4.74         | 3.67         |
| 1074_13_H1_1                                                                   | v-H1(rH1)       | ARDERTVGERWFLGLDV    | QSYDSSLSDSAV | 145      | 0        | 45.83        | 0.00         |
| 1074_13_H1_3                                                                   | v-H1(rH1)       | ARDTEIVVGELIYFHYGMDV | MQRIDFPYT    | 29       | 1        | 3.51         | 3.77         |
| 1074_13_H1_4                                                                   | v-H1(rH1)       | AREDLVIGEGMYNGVDV    | SSYTISSLVV   | 44       | 0        | 3.39         | 0.00         |
| 1074_13_H1_5                                                                   | v-H1(rH1)       | AKDQGGPSSVMKGFHS     | QQYFNWPPIT   | 34       | 0        | 3.29         | 0.00         |
| 1074_13_H1_9                                                                   | v-H1(rH1)       | AKEWGWQVDTDPFDI      | QQYNDWPLT    | 23       | 0        | 1.66         | 0.00         |
| 1074_13_H1_10                                                                  | CR(rH1,3)       | ARMFSELENPTGCLDY     | QQSYTNPPWT   | 18       | 0        | 1.65         | 0.00         |
| 1074_14_CR_4                                                                   | CR(M1)          | ARLYDFWNGYPNFDH      | ATWDDTQNGPV  | 40       | 31       | 3.46         | 1.28         |
| 1074_13_H1_20                                                                  | CR(Glycan)      | ARRTGIGYPYNWFDS      | QQYYTAPPT    | 6        | 0        | 0.38         | 0.00         |
| 1074_14_CR_29                                                                  | CR(Glycan)      | VREGTWTGYFDL         | QKYNSPPRT    | 6        | 6        | 0.19         | 0.08         |
| 1074_13_H3_4                                                                   | v-H3(rH3)       | ARSPGGHSTVEYKSHAFDL  | QSVGSSSSYVI  | 0        | 17       | 0.00         | 5.14         |
| 1074_13_H3_10                                                                  | v-H3(rH3)       | GRLSMVREVAGPLLDV     | QSYDSSLSGSVV | 0        | 17       | 0.00         | 1.23         |
| 1074_13_H3_19                                                                  | v-H3(rH3)       | AKVYICIMNSCYNDY      | QSYDSTLSV FV | 0        | 11       | 0.00         | 0.38         |
| 1025_13_CR_4                                                                   | CR(Glycan)      | ARGGLAIGEY           | AAWDSSLNAYV  | 10       | 11       | 0.47         | 0.81         |
| 1025_14_H1_8                                                                   | CR(Glycan)      | VRAIASADSY           | GAWDNNLSAMV  | 3        | 1        | 1.29         | 0.00         |
| 236_CR_1                                                                       | CR(NP)          | ARGNMLRVPDY          | LQYYSDPLT    | 14       | 16       | 25.07        | 22.22        |
| 236_CR_2                                                                       | CR(Glycan)      | ARAIAAADSY           | AAWDDSLNALV  | 18       | 12       | 4.18         | 3.55         |
| 236_H1_1                                                                       | v-H1(rH1)       | ARDPYDNSGPVKPGDV     | QQTHSFPR T   | 27       | 1        | 25.78        | 0.00         |
| 236_H1_3                                                                       | v-H1(rH1)       | ARRYSGNSYAYDY        | QHYDTSLT     | 5        | 0        | 2.25         | 0.00         |
| 236_H3_1                                                                       | v-H3(rH3)       | ARGRVDP SLRGAIVKGLDY | QQYYT TSLWT  | 0        | 6        | 0.00         | 13.94        |
| 1088_H3_7                                                                      | v-H3(rH3)       | ARFYGNSFDS           | QQGINS PFT   | 0        | 6        | 0.00         | 0.39         |
| 1088_CR_21                                                                     | CR(Glycan)      | ARAIGAAEAY           | ASWDHSLSGVV  | 10       | 6        | 0.30         | 0.16         |
| 1044_H3_7                                                                      | v-H3(rH3)       | ARELGDTMVRGLLDWFDP   | QAWDSRTAV    | 0        | 4        | 0.00         | 2.45         |
| 29_CR_1                                                                        | CR(M1)          | ARDLLVAVPDKGPF       | QQYNGYSRT    | 128      | 55       | 55.67        | 16.74        |
| 29_CR_2                                                                        | CR(M2e)         | ARHLGSSASSYSIDV      | QQSYNTPIT    | 25       | 23       | 16.05        | 32.32        |
| 29_CR_4                                                                        | CR(NP)          | AREVNNRHAFNV         | QLYGTDSWA    | 29       | 29       | 2.27         | 8.67         |
| 29_CR_12                                                                       | CR(Glycan)      | TRKVG DV             | ATWDDSLKGWV  | 7        | 6        | 0.42         | 1.04         |
| 29_CR_18                                                                       | CR(Glycan)      | ARGLSATYPNTFQN       | MQPLYAPT     | 10       | 14       | 0.27         | 1.90         |
| 29_CR_20                                                                       | CR(NP)          | ARGEAYFYDRNFYPR      | HQYNTLPWT    | 5        | 6        | 0.21         | 0.35         |

|              |            |                        |             |    |    |      |      |
|--------------|------------|------------------------|-------------|----|----|------|------|
| 29_CR_34     | CR(NP)     | ARTSGGDTYNLGGFDF       | QVWDSSTDHVV | 2  | 4  | 0.05 | 0.04 |
| 29_H1_3      | v-H1(rH1)  | ASQPRIYGGFQVV          | QQFNQYPLT   | 11 | 0  | 2.32 | 0.00 |
| 29_H1_12     | v-H1(rH1)  | ARESGGTYYLGEDGFDI      | MQSIQLPIT   | 4  | 0  | 0.08 | 0.00 |
| 29_H3_4      | v-H3(rH3)  | ARDEVQGTVALPSNRNNWFDP  | QQYNFWPRT   | 0  | 18 | 0.00 | 2.51 |
| 1131_13_H1_6 | v-H1(rH1)  | ARESAYHYDLGGYFYQY      | QQYGSSPRT   | 8  | 0  | 0.44 | 0.00 |
| 1117_13_CR_4 | CR(Glycan) | VRAVGGHDSY             | AAWDGSLKAYV | 26 | 20 | 3.42 | 2.45 |
| 1117_13_CR_6 | CR(rH1,3)  | ARGGAELLSFGEPHKKYKWIDL | QQTYTTSIT   | 13 | 13 | 2.15 | 5.80 |

**Supplemental Table 3. Glycan array binding data for top 100 glycans.**

| Glycan                                                                                                                            | Average RFU       | SEM  | %CV | Average RFU     | SEM  | %CV |
|-----------------------------------------------------------------------------------------------------------------------------------|-------------------|------|-----|-----------------|------|-----|
|                                                                                                                                   | <b>1088_CR_21</b> |      |     | <b>29_CR_12</b> |      |     |
| (6S)(4S)Galb1-4GlcNAcb-Sp0                                                                                                        | 65112             | 22   | 0   | 65213           | 164  | 0   |
| (4S)Galb1-4GlcNAcb-Sp8                                                                                                            | 64608             | 260  | 0   | 65265           | 53   | 0   |
| (6S)Galb1-4GlcNAcb-Sp8                                                                                                            | 65244             | 42   | 0   | 64602           | 299  | 0   |
| (3S)Galb1-4GlcNAcb-Sp0                                                                                                            | 63127             | 1010 | 2   | 63790           | 1434 | 2   |
| (3S)Galb1-4GlcNAcb-Sp8                                                                                                            | 42789             | 7945 | 19  | 23173           | 2278 | 10  |
| 6S(3S)Galb1-4(6S)GlcNAcb-Sp0                                                                                                      | 64794             | 532  | 1   | 257             | 39   | 15  |
| (3S)Galb1-4(Fuca1-3)(6S)GlcNAcb-Sp8                                                                                               | 64474             | 556  | 1   | 86              | 65   | 76  |
| (3S)Galb1-4(Fuca1-3)GlcNAcb-Sp0                                                                                                   | 30483             | 2528 | 8   | 25236           | 2195 | 9   |
| (3S)Galb1-4(6S)GlcNAcb-Sp0                                                                                                        | 50517             | 5040 | 10  | 35              | 7    | 20  |
| 6S(3S)Galb1-4GlcNAcb-Sp0                                                                                                          | 16129             | 1617 | 10  | 6175            | 296  | 5   |
| (3S)Galb1-4(6S)GlcNAcb-Sp8                                                                                                        | 15350             | 676  | 4   | 38              | 7    | 19  |
| (6S)Galb1-4(6S)GlcNAcb-Sp0                                                                                                        | 9977              | 652  | 7   | 38              | 18   | 47  |
| GlcNAcb1-3Galb1-4GlcNAcb1-6(GlcNAcb1-3Galb1-4GlcNAcb1-2)Mana1-6(GlcNAcb1-3Galb1-4GlcNAcb1-2Man a1-3)Manb1-4GlcNAcb1-4GlcNAcb-Sp24 | 1636              | 497  | 30  | 2479            | 787  | 32  |
| GlcNAcb1-3Galb1-4GlcNAcb1-2Mana1-6(GlcNAcb1-3Galb1-4GlcNAcb1-2Mana1-3)Manb1-4GlcNAcb1-4GlcNAcb-Sp12                               | 3552              | 404  | 11  | 483             | 107  | 22  |

|                                                                                                                                                                         |      |     |    |     |     |    |
|-------------------------------------------------------------------------------------------------------------------------------------------------------------------------|------|-----|----|-----|-----|----|
| GlcNAcb1-3Galb1-4GlcNAcb1-3Galb1-4GlcNAcb1-2Mana1-6(GlcNAcb1-3Galb1-4GlcNAcb1-3Galb1-4GlcNAcb1-2Mana1-3)Manb1-4GlcNAcb1-4GlcNAcb-Sp12                                   | 1825 | 282 | 15 | 701 | 134 | 19 |
| Galb1-4GlcNAcb1-3Galb1-4GlcNAcb1-6(Galb1-4GlcNAcb1-3Galb1-4GlcNAcb1-2)Mana1-6(Galb1-4GlcNAcb1-3Galb1-4GlcNAcb1-2Mana1-3)Mana1-4GlcNAcb1-4GlcNAc-Sp24                    | 1421 | 500 | 35 | 479 | 329 | 69 |
| Fuca1-2(6S)Galb1-4GlcNAcb-Sp0                                                                                                                                           | 1219 | 127 | 10 | 92  | 27  | 29 |
| Galb1-4GlcNAcb1-3Galb1-4GlcNAcb1-3Galb1-4GlcNAcb1-2Mana1-6(Galb1-4GlcNAcb1-3Galb1-4GlcNAcb1-3Galb1-4GlcNAcb1-2Mana1-3)Manb1-4GlcNAcb1-4GlcNAcb-Sp12                     | 1028 | 121 | 12 | 155 | 37  | 24 |
| (6S)(4S)GalNAcb1-4GlcNAc-Sp8                                                                                                                                            | 1077 | 244 | 23 | 37  | 26  | 71 |
| Galb1-4(6S)Glc-Sp0                                                                                                                                                      | 55   | 7   | 12 | 974 | 229 | 24 |
| Neu5Aca2-6Galb1-4GlcNAcb1-3Galb1-4GlcNAcb1-3Galb1-4GlcNAcb1-2Mana1-6(Neu5Aca2-6Galb1-4GlcNAcb1-3Galb1-4GlcNAcb1-3Galb1-4GlcNAcb1-2Mana1-3)Manb1-4GlcNAcb1-4GlcNAcb-Sp12 | 751  | 242 | 32 | 198 | 108 | 55 |
| Galb1-4GlcNAcb1-3Galb1-4GlcNAcb1-6(Galb1-4GlcNAcb1-3Galb1-4GlcNAcb1-2)Mana1-6(Galb1-4GlcNAcb1-3Galb1-4GlcNAcb1-2Mana1-3)Manb1-4GlcNAcb1-4(Fuca1-6)GlcNAcb-Sp24          | 540  | 47  | 9  | 287 | 47  | 16 |
| Galb1-3GlcNAcb1-3Galb1-3GlcNAcb-Sp0                                                                                                                                     | 489  | 12  | 3  | 305 | 47  | 15 |
| GlcNAca1-4Galb1-4GlcNAcb1-3Galb1-4(Fuca1-3)GlcNAcb1-3Galb1-4(Fuca1-3)GlcNAcb-Sp0                                                                                        | 298  | 59  | 20 | 371 | 147 | 40 |
| Galb1-4GlcNAcb1-3Galb1-4GlcNAcb1-6(Galb1-4GlcNAcb1-3Galb1-4GlcNAcb1-3)GalNAca-Sp14                                                                                      | 431  | 52  | 12 | 199 | 83  | 42 |
| (3S)Galb-Sp8                                                                                                                                                            | 128  | 16  | 13 | 478 | 333 | 70 |



|                                                                                                                                                                                                  |     |     |    |     |     |    |
|--------------------------------------------------------------------------------------------------------------------------------------------------------------------------------------------------|-----|-----|----|-----|-----|----|
| GalNAcb1-4(Neu5Aca2-3)Galb1-4GlcNAcb1-3GalNAca-Sp14                                                                                                                                              | 432 | 42  | 10 | 119 | 22  | 19 |
| GalNAcb1-4Galb1-4Glc-Sp0                                                                                                                                                                         | 302 | 49  | 16 | 211 | 111 | 53 |
| Galb1-4GlcNAcb1-3Galb1-4GlcNAcb1-6(Galb1-3)GalNAca-Sp14                                                                                                                                          | 460 | 135 | 29 | 46  | 23  | 49 |
| Neu5Aca2-3Galb1-4GlcNAcb1-3Galb1-4GlcNAcb1-3Galb1-4GlcNAcb1-2Mana1-6(Neu5Aca2-3Galb1-4GlcNAcb1-3Galb1-4GlcNAcb1-3Galb1-4GlcNAcb1-2Mana1-3)Manb1-4GlcNAcb1-4GlcNAcb-Sp12                          | 363 | 74  | 20 | 109 | 48  | 44 |
| GlcNAcb1-3Galb-Sp8                                                                                                                                                                               | 53  | 2   | 3  | 395 | 305 | 77 |
| (6S)Galb1-3(6S)GlcNAc-Sp0                                                                                                                                                                        | 402 | 61  | 15 | 36  | 11  | 30 |
| Fuca1-2Galb1-4(Fuca1-3)GlcNAcb1-3GalNAca-Sp14                                                                                                                                                    | 342 | 65  | 19 | 96  | 13  | 13 |
| Fuca1-4(Galb1-3)GlcNAcb1-2 Mana-Sp0                                                                                                                                                              | 100 | 18  | 18 | 329 | 97  | 29 |
| GalNAca-Sp15                                                                                                                                                                                     | 157 | 9   | 6  | 262 | 115 | 44 |
| Glc1-6Glc1-6Glc-Sp8                                                                                                                                                                              | 229 | 27  | 12 | 187 | 138 | 74 |
| Galb1-4GlcNAcb-Sp23                                                                                                                                                                              | 172 | 6   | 3  | 241 | 46  | 19 |
| Galb1-3GlcNAcb1-3Galb1-4GlcNAcb1-6(Galb1-3GlcNAcb1-3Galb1-4GlcNAcb1-2)Mana1-6(Galb1-3GlcNAcb1-3Galb1-4GlcNAcb1-2Mana1-3)Manb1-4GlcNAcb1-4(Fuca1-6)GlcNAcb-Sp24                                   | 265 | 51  | 19 | 144 | 40  | 28 |
| Neu5Aca2-3Galb1-4GlcNAcb1-2Mana-Sp0                                                                                                                                                              | 275 | 62  | 23 | 124 | 36  | 29 |
| (3S)Galb1-4Glc-Sp8                                                                                                                                                                               | 191 | 22  | 12 | 202 | 98  | 48 |
| Galb1-3GlcNAcb1-3Galb1-4GlcNAcb1-3Galb1-4GlcNAcb1-6(Galb1-3GlcNAcb1-3Galb1-4GlcNAcb1-3Galb1-4GlcNAcb1-2)Mana1-6(Galb1-3GlcNAcb1-3Galb1-4GlcNAcb1-2Mana1-3)Manb1-4GlcNAcb1-4(Fuca1-6)GlcNAcb-Sp24 | 345 | 19  | 6  | 41  | 12  | 29 |
| Galb1-4GlcNAcb1-3Galb1-4GlcNAcb1-3GalNAca-Sp14                                                                                                                                                   | 325 | 78  | 24 | 41  | 15  | 35 |

|                                                                                                                                                                                             |     |     |    |     |     |     |
|---------------------------------------------------------------------------------------------------------------------------------------------------------------------------------------------|-----|-----|----|-----|-----|-----|
| Glc b-Sp8                                                                                                                                                                                   | 247 | 82  | 33 | 120 | 58  | 49  |
| Glc a1-6Glc a1-6Glc a1-6Glc b-Sp10                                                                                                                                                          | 136 | 13  | 9  | 229 | 84  | 37  |
| Gal b1-4GlcNAc b1-3Gal b1-4GlcNAc b1-2Man a1-6(Gal b1-4GlcNAc b1-3Gal b1-4GlcNAc b1-2Man a1-3)Man b1-4GlcNAc b1-4(Fuca 1-6)GlcNAc b-Sp24                                                    | 255 | 12  | 5  | 107 | 141 | 132 |
| Fuca 1-2(6S)Gal b1-3(6S)GlcNAc b-Sp0                                                                                                                                                        | 264 | 37  | 14 | 93  | 23  | 24  |
| GlcNAc b1-2Man a1-6(GlcNAc b1-2Man a1-3)Man b1-4GlcNAc b1-4(Fuca 1-6)GlcNAc b-Sp22                                                                                                          | 285 | 68  | 24 | 47  | 16  | 34  |
| Gala 1-3(Fuca 1-2)Gal b1-4(Fuca 1-3)Glc b-Sp21                                                                                                                                              | 56  | 6   | 10 | 275 | 173 | 63  |
| Neu5Aca 2-6Gal b1-4GlcNAc b1-6(Neu5Aca 2-6Gal b1-4GlcNAc b1-2)Man a1-6(GlcNAc b1-4)(Neu5Aca 2-6Gal b1-4GlcNAc b1-4(Neu5Aca 2-6Gal b1-4GlcNAc b1-2)Man a1-3)Man b1-4GlcNAc b1-4GlcNAc b-Sp21 | 259 | 178 | 69 | 70  | 174 | 247 |
| Man b-Sp8                                                                                                                                                                                   | 108 | 34  | 32 | 203 | 140 | 69  |
| Neu5Aca 2-3Gal b1-4(Fuca 1-3)GlcNAc b1-3GalNAc a-Sp14                                                                                                                                       | 209 | 30  | 14 | 99  | 26  | 26  |
| Glc a-Sp8                                                                                                                                                                                   | 184 | 18  | 10 | 110 | 56  | 51  |
| Man a1-2Man a1-2Man a1-3Man a-Sp9                                                                                                                                                           | 179 | 45  | 25 | 109 | 97  | 89  |
| Gal b1-4(Fuca 1-3)GlcNAc b1-2Man a-Sp0                                                                                                                                                      | 261 | 84  | 32 | 25  | 9   | 36  |
| Gala 1-3(Fuca 1-2)Gal b1-4GlcNAc b1-6(Gala 1-3(Fuca 1-2)Gal b1-4GlcNAc b1-3)GalNAc-Sp14                                                                                                     | 134 | 26  | 20 | 147 | 38  | 26  |
| Fuca 1-2Gal b1-4(Fuca 1-3)GlcNAc b1-2Man a1-6(Fuca 1-2Gal b1-4(Fuca 1-3)GlcNAc b1-2Man a1-3)Man b1-4GlcNAc b1-4(Fuca 1-6)GlcNAc b-Sp24                                                      | 220 | 24  | 11 | 57  | 4   | 8   |
| Gal b1-4GlcNAc b1-2Man a-Sp0                                                                                                                                                                | 222 | 82  | 37 | 54  | 16  | 29  |
| Gal b1-3GlcNAc b1-2Man a1-6(GlcNAc b1-4)(Gal b1-3GlcNAc b1-2Man a1-3)Man b1-4GlcNAc b1-4GlcNAc b-Sp21                                                                                       | 177 | 78  | 44 | 96  | 21  | 22  |

|                                                                                                                                             |     |    |    |     |     |     |
|---------------------------------------------------------------------------------------------------------------------------------------------|-----|----|----|-----|-----|-----|
| Galb1-4(Fuca1-3)GlcNAcb1-6GalNAc-Sp14                                                                                                       | 156 | 10 | 7  | 116 | 61  | 52  |
| Fuca1-2Galb1-3(Fuca1-4)GlcNAcb1-2Mana1-6(Fuca1-2Galb1-3(Fuca1-4)GlcNAcb1-2Mana1-3)Manb1-4GlcNAcb1-4(Fuca1-6)GlcNAcb1-4(Fuca1-6)GlcNAcb-Sp19 | 220 | 21 | 10 | 45  | 3   | 7   |
| (3S)Galb1-4(6S)Glc-Sp0                                                                                                                      | 210 | 23 | 11 | 52  | 12  | 23  |
| GalNAca1-3(Fuca1-2)Galb1-3GlcNAcb1-3GalNAc-Sp14                                                                                             | 228 | 84 | 37 | 33  | 8   | 24  |
| Fuca1-2Galb1-4GlcNAcb1-6(Fuca1-2Galb1-4GlcNAcb1-3)GalNAc-Sp14                                                                               | 152 | 3  | 2  | 107 | 74  | 69  |
| Gala1-3(Fuca1-2)Galb1-3GlcNAcb-Sp8                                                                                                          | 156 | 24 | 15 | 100 | 28  | 28  |
| Mana1-6(Mana1-3)Manb1-4GlcNAcb1-4GlcNAcb-Sp12                                                                                               | 195 | 14 | 7  | 56  | 22  | 39  |
| GlcNAcb1-3Galb1-4GlcNAcb1-3Galb1-4GlcNAcb1-2Mana1-6(GlcNAcb1-3Galb1-4GlcNAcb1-3Galb1-4GlcNAcb1-2Mana1-3)Manb1-4GlcNAcb1-4GlcNAcb-Sp25       | 193 | 14 | 7  | 55  | 46  | 85  |
| Rhaa-Sp8                                                                                                                                    | 197 | 31 | 16 | 42  | 15  | 36  |
| (3S)Galb1-4(6S)Glc-Sp8                                                                                                                      | 164 | 24 | 15 | 73  | 40  | 55  |
| Glc1-4Glc-Sp8                                                                                                                               | 190 | 48 | 25 | 46  | 8   | 16  |
| Fuca1-2(6S)Galb1-4(6S)Glc-Sp0                                                                                                               | 216 | 38 | 17 | 19  | 5   | 25  |
| Neu5Gca2-6Galb1-4GlcNAcb-Sp0                                                                                                                | 100 | 20 | 20 | 130 | 152 | 117 |
| Fuca1-2Galb1-3GlcNAcb1-2Mana1-6(Fuca1-2Galb1-3GlcNAcb1-2Mana1-3)Manb1-4GlcNAcb1-4(Fuca1-6)GlcNAcb-Sp22                                      | 137 | 47 | 34 | 93  | 22  | 23  |
| Gala1-3Galb1-4GlcNAcb1-2Mana1-6(Gala1-3Galb1-4GlcNAcb1-2Mana1-3)Manb1-4GlcNAcb1-4GlcNAc-Sp24                                                | 187 | 25 | 14 | 41  | 22  | 55  |
| Fuca1-2Galb1-4GlcNAcb1-6GalNAca-Sp14                                                                                                        | 178 | 14 | 8  | 47  | 8   | 18  |
| Galb1-4GlcNAcb1-6(Galb1-4GlcNAcb1-2)Mana1-6(Galb1-4GlcNAcb1-2Mana1-3)Manb1-4GlcNAcb1-4(Fuca1-6)GlcNAcb-Sp24                                 | 107 | 4  | 3  | 117 | 103 | 88  |

|                                                                                                                                 |     |    |    |     |     |     |
|---------------------------------------------------------------------------------------------------------------------------------|-----|----|----|-----|-----|-----|
| Galb1-4GalNAcb1-3(Fuca1-2)Galb1-4GlcNAcb-Sp8                                                                                    | 68  | 7  | 11 | 154 | 108 | 70  |
| Fuca1-2Galb1-3(6S)GlcNAcb-Sp0                                                                                                   | 175 | 17 | 10 | 47  | 29  | 62  |
| Fuca1-2Galb1-4GlcNAcb1-3Galb1-4GlcNAcb1-2Mana1-6(Fuca1-2Galb1-4GlcNAcb1-3Galb1-4GlcNAcb1-2Mana1-3)Manb1-4GlcNAcb1-4GlcNAcb-Sp24 | 168 | 10 | 6  | 51  | 29  | 56  |
| Gala1-4Galb1-4GlcNAcb1-2Mana1-6(Gala1-4Galb1-4GlcNAcb1-2Mana1-3)Manb1-4GlcNAcb1-4GlcNAcb-Sp24                                   | 146 | 33 | 22 | 72  | 21  | 29  |
| Gala-Sp8                                                                                                                        | 132 | 6  | 5  | 85  | 47  | 55  |
| Gala1-3(Fuca1-2)Galb1-4Glc-Sp0                                                                                                  | 181 | 76 | 42 | 36  | 5   | 13  |
| Gala1-3(Fuca1-2)Galb1-3GlcNAcb-Sp0                                                                                              | 195 | 10 | 5  | 22  | 4   | 18  |
| Gala1-3Galb1-4GlcNAcb1-6GalNAca-Sp14                                                                                            | 163 | 7  | 4  | 53  | 24  | 45  |
| (3S)Galb1-4(Fuca1-3)Glc-Sp0                                                                                                     | 181 | 10 | 6  | 35  | 9   | 25  |
| (3S)Galb1-3GalNAca-Sp8                                                                                                          | 154 | 18 | 12 | 60  | 13  | 21  |
| GlcNAcb1-2Mana1-6(GlcNAcb1-2Mana1-3)Manb1-4GlcNAcb1-4GlcNAcb-Sp13                                                               | 177 | 13 | 7  | 36  | 7   | 20  |
| Mana1-2Mana1-6(Mana1-2Mana1-3)Mana1-6(Mana1-2Mana1-2Mana1-3)Manb1-4GlcNAcb1-4GlcNAcb-Sp12                                       | 195 | 15 | 8  | 18  | 7   | 40  |
| GalNAcb1-4GlcNAcb1-2Mana1-6(GalNAcb1-4GlcNAcb1-2Mana1-3)Manb1-4GlcNAcb1-4GlcNAcb-Sp12                                           | 176 | 20 | 11 | 36  | 20  | 54  |
| Neu5Aca2-6Galb1-4GlcNAcb1-2Mana1-6(Neu5Aca2-6Galb1-4GlcNAcb1-2Mana1-3)Manb1-4GlcNAcb1-4GlcNAcb-Sp24                             | 142 | 33 | 23 | 70  | 73  | 104 |
| Gala1-3(Fuca1-2)Galb1-4(Fuca1-3)GlcNAcb-Sp0                                                                                     | 151 | 22 | 14 | 61  | 16  | 26  |
| Galb1-3(6S)GlcNAcb-Sp8                                                                                                          | 114 | 34 | 30 | 97  | 168 | 174 |
| GlcNAcb1-6(Galb1-4GlcNAcb1-3)Galb1-4GlcNAcb-Sp0                                                                                 | 141 | 18 | 13 | 68  | 64  | 94  |
| Neu5Aca2-6Galb1-4(6S)GlcNAcb-Sp8                                                                                                | 156 | 12 | 8  | 51  | 33  | 64  |

|                                                                                                        |     |    |    |     |     |     |
|--------------------------------------------------------------------------------------------------------|-----|----|----|-----|-----|-----|
| GlcNAcb1-2(GlcNAcb1-6)Mana1-6(GlcNAcb1-2Mana1-3)Manb1-4GlcNAcb1-4GlcNAcb-Sp19                          | 182 | 7  | 4  | 25  | 5   | 20  |
| Galb1-3GlcNAcb1-2Mana-Sp0                                                                              | 120 | 30 | 25 | 87  | 37  | 42  |
| Galb1-3(Fuca1-4)GlcNAc-Sp0                                                                             | 146 | 20 | 14 | 60  | 69  | 115 |
| Galb1-3Galb-Sp8                                                                                        | 156 | 5  | 3  | 48  | 6   | 13  |
| Fuca1-2Galb1-4GlcNAcb1-2Mana1-6(Fuca1-2Galb1-4GlcNAcb1-2Mana1-3)Manb1-4GlcNAcb1-4(Fuca1-6)GlcNAcb-Sp22 | 159 | 12 | 8  | 45  | 21  | 47  |
| Galb1-4GlcNAcb1-6GalNAc-Sp14                                                                           | 59  | 2  | 4  | 145 | 34  | 23  |
| Galb1-4(Fuca1-3)GlcNAcb1-6(Fuca1-4(Fuca1-2Galb1-3)GlcNAcb1-3)Galb1-4Glc-Sp21                           | 60  | 4  | 7  | 143 | 159 | 111 |

**Supplemental Data Set 1 (Microsoft Excel format). Tabulated serum antibody clonotypes identified from Ig-Seq analysis.**
